# Supplementary material for: Long-Term Changes to the Microbiome, Blood Lipid Profiles and IL-6 in Female and Male Swedish Patients in Response to Bariatric Roux-en-Y Gastric Bypass
Source: MDPI journal article supplement (doi:10.3390/nu16040498), 2024-02-09
Supplement: s1 [file s1]

A

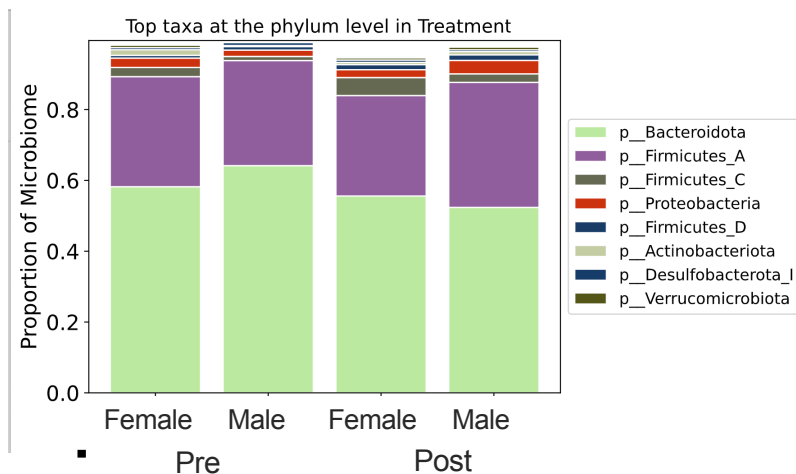

B

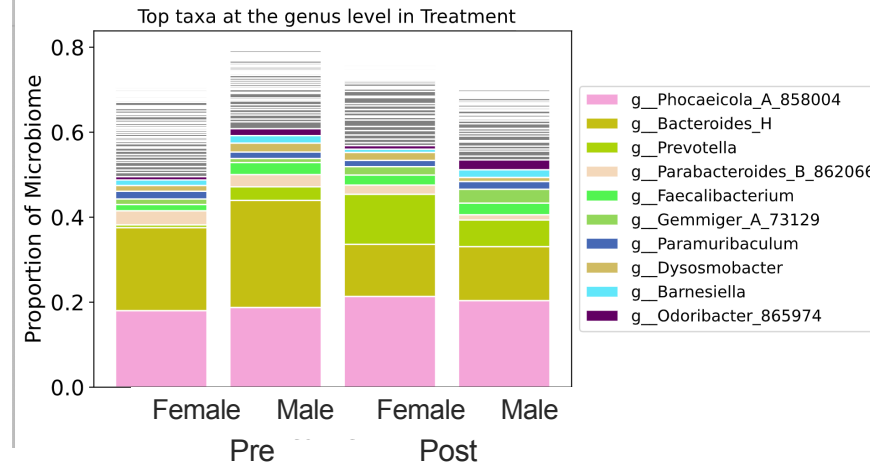

C

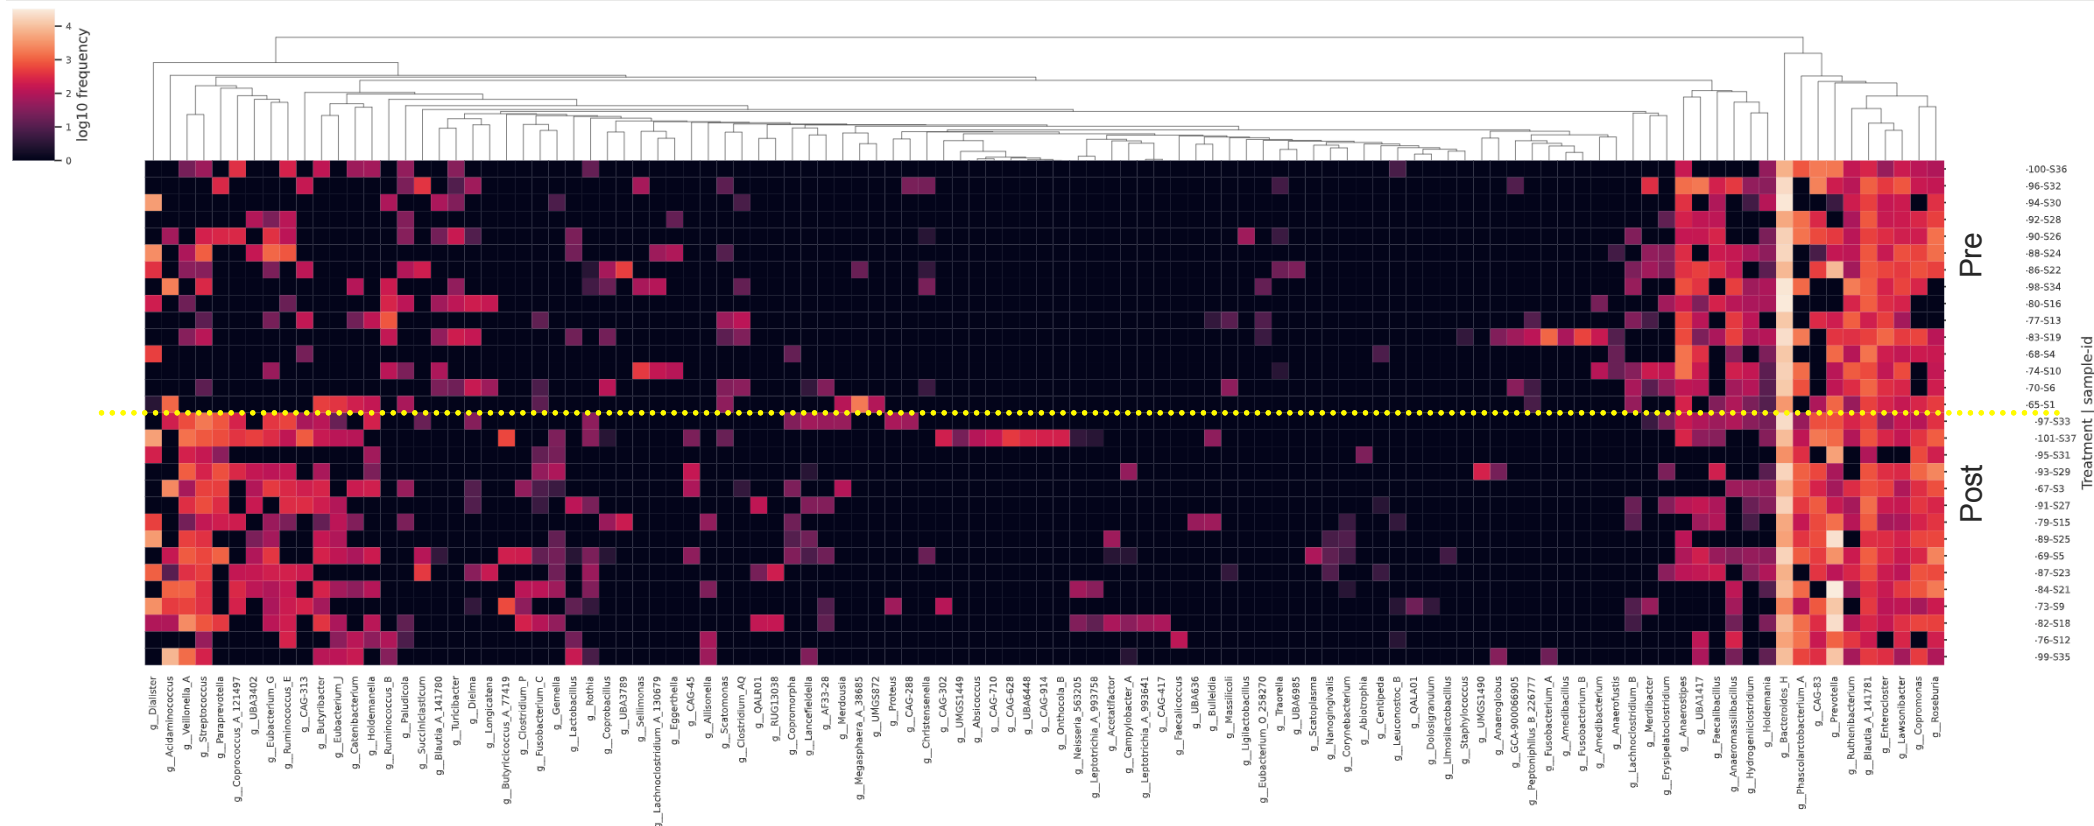

Figure S1. The visual abundance of all bacteria at phylum (A) and genus levels (B) per group and in individual patients (C) before (pre-) and after (post) surgery.
