# Supplementary material for: Long-Term Changes to the Microbiome, Blood Lipid Profiles and IL-6 in Female and Male Swedish Patients in Response to Bariatric Roux-en-Y Gastric Bypass
Source: Nutrients. 2024 Feb 9;16(4):498. doi: 10.3390/nu16040498 (PMC10891850; doi:10.3390/nu16040498)
Supplement: Supplementary file 1 [file nutrients-16-00498-s001.zip › Supplementary Table S1 Sampling schedule.xlsx]

## Sheet: Blad1
Supplementary Table S1: Sampling schedule
Patient	Body weight, Kg	BMI, Kg/m2	QoL assessments	Stool sampling	Blood sampling
1	0/6/72	0/6/72	0/72	0/12/72	0/72
2	0/6/72	0/6/72	0/72	0/12/72	0/72
3	0/6/12/72	0/6/12/72	0/72	0/12/72	0/72
4	0/6/72	0/6/72	0/72	0/12/72	0/72
5	0/6/72	0/6/72	0/72	0/12/72	0/72
6	0/12/72	0/12/72	0/72	0/12/72	0/72
7	0/12/72	0/12/72	0/72	0/12/72	0/72
8	0/12/72	0/12/72	0/12	0/12/72	0/72
9	0/12	0/12	0/24	0/24	0/24
10	0/24	0/24	0/24	0/24	0/24
11	0/24	0/24	0/24	0/24	0/24
12	0/24	0/24	0/24	0/24	0/24
13	0/24	0/24	0/24	0/24	0/24
14	0/24	0/24	0/24	0/24	0/24
15	0/24	0/24	0/24	0/24	0/24
Numbers in the columns indicate month after surgery when sampling occured, where 0 - is before the surgery; QoL, Quality of Life
